# Supplementary material for: Identification of Factors Associated with Potential Doping Behavior in Sports: A Cross-Sectional Analysis in High-Level Competitive Swimmers
Source: Int J Environ Res Public Health. 2018 Aug 10;15(8):1720. doi: 10.3390/ijerph15081720 (PMC6121562; doi:10.3390/ijerph15081720)
Supplement: Supplementary file 1 [file ijerph-15-01720-s001.pdf]

**Supplementary table 1.** Descriptive statistics (frequencies – F, percentages - %) for categorical and ordinal variables

|                                                                 | F   | %     |
|-----------------------------------------------------------------|-----|-------|
| <b>Gender</b>                                                   |     |       |
| Male                                                            | 148 | 49.2% |
| Female                                                          | 153 | 50.8% |
| <b>Competitive result in Olympic disciplines</b>                |     |       |
| regional level                                                  | 53  | 17.6% |
| national championship                                           | 227 | 75.4% |
| national championship - medal                                   | 13  | 4.3%  |
| European/World/Olympics - participation                         | 8   | 2.7%  |
| <b>Competitive result in non-Olympic disciplines</b>            |     |       |
| regional level                                                  | 56  | 18.6% |
| national championship                                           | 85  | 28.2% |
| national championship - medal                                   | 150 | 49.8% |
| European/World - participation                                  | 10  | 3.3%  |
| <b>Dietary supplementation</b>                                  |     |       |
| Yes, regularly                                                  | 47  | 15.6% |
| From time to time                                               | 145 | 48.2% |
| No                                                              | 109 | 36.2% |
| <b>Alcohol consumption</b>                                      |     |       |
| I don't drink alcohol                                           | 212 | 70.4% |
| I drink alcohol but never binge                                 | 74  | 24.6% |
| binge drinking once a month or so                               | 14  | 4.7%  |
| binging more than once a month                                  | 1   | 0.3%  |
| <b>Cigarette smoking</b>                                        |     |       |
| I don't smoke                                                   | 294 | 97.7% |
| I smoke from time to time, but not daily                        | 3   | 1.0%  |
| less than 10 cigarettes per day                                 | 3   | 1.0%  |
| more than 10 cigarettes per day                                 | 1   | 0.3%  |
| <b>Doping occurrence in swimming</b>                            |     |       |
| I don't think doping is used in swimming                        | 8   | 2.7%  |
| Don't know/not sure                                             | 29  | 9.6%  |
| Doping occurs, but rarely                                       | 167 | 55.5% |
| Doping is frequent in swimming                                  | 97  | 32.2% |
| <b>Number of doping testing</b>                                 |     |       |
| Never tested                                                    | 282 | 93.7% |
| Once or twice                                                   | 14  | 4.7%  |
| Three times and more                                            | 6   | 2.0%  |
| <b>The main problem of doping in sports</b>                     |     |       |
| It is mainly health-threatening behavior                        | 112 | 37.2% |
| It is against fair play                                         | 188 | 62.5% |
| <b>Penalties for doping offenders</b>                           |     |       |
| <b>lifelong suspension</b>                                      | 72  | 23.9% |
| milder punishment for the first time, then lifelong suspension  | 121 | 40.2% |
| suspension for a couple of seasons                              | 101 | 33.6% |
| financial punishment                                            | 6   | 2.0%  |
| no punishment/should be allowed                                 | 1   | 0.3%  |
| <b>Potential doping behavior</b>                                |     |       |
| I would use doping if it would help me (with no negative health | 35  | 11.6% |
| Not sure                                                        | 45  | 15.0% |
| Don't intend to use it                                          | 217 | 72.1% |

**Supplementary table 2.** Descriptive statistics (Means and Standard deviations) for parametric variables

|                                                           | Mean  | SD   |
|-----------------------------------------------------------|-------|------|
| <b>Sociodemographic and sport factors</b>                 |       |      |
| Age (years)                                               | 16.4  | 2.40 |
| Age when started with swimming (years)                    | 8.7   | 3.20 |
| Experience in swimming (years)                            | 7.7   | 2.60 |
| Knowledge on doping (score)                               | 2.80  | 1.64 |
| <b>Factors of hesitation **</b>                           |       |      |
| Condemnation by family members                            | 1.78  | 1.48 |
| Condemnation by friends                                   | 1.69  | 1.45 |
| Condemnation by the public (beyond family or friends)     | 1.48  | 1.76 |
| Condemnation by religious institutions                    | -1.91 | 1.65 |
| The negative image that will be created in media          | 1.61  | 1.65 |
| Underestimation of “clean” results                        | 1.93  | 1.45 |
| Possible negative financial consequences                  | 1.23  | 1.70 |
| Eventual imprisonment because of the use of illegal drugs | 1.93  | 1.52 |
| Disqualification from competition                         | 2.44  | 1.17 |
| Disqualification of previously achieved results           | 2.00  | 1.43 |
| Potential problems with future employment                 | 2.31  | 1.23 |
| Behavioral disorders                                      | 2.05  | 1.35 |
| Psychological addiction to doping                         | 1.92  | 1.56 |
| Hormonal dysfunctions                                     | 1.83  | 1.54 |
| Problems with the vital organs                            | 2.11  | 1.29 |
| Cardiovascular problems                                   | 2.16  | 1.24 |
| Body deformities                                          | 2.35  | 1.13 |
| Weakening of immune function                              | 2.31  | 1.09 |
| Self-disappointment, or feelings of self-failure          | 2.34  | 1.35 |

LEGEND: \* - theoretical range for knowledge on doping was from “0” to “10” (maximal score); \*\* - factors of hesitation were self-rated on a scale ranging from “-3” (not important at all), to “+3” (very important)
